1 Population based estimates of comorbidities affecting risk for complications from COVID-19 in  
2 the US

3 Mary L. Adams, MS, MPH, On Target Health Data LLC, Suffield, CT, USA, David L. Katz,  
4 MD, MPH, FACPM, FACP, FACLM, Yale-Griffin Prevention Research Center, Derby, CT,  
5 USA, Joseph Grandpre, PhD, MPH, Wyoming Department of Health, Cheyenne, WY, USA.

6 Author affiliations: On Target Health Data LLC, Suffield, CT, USA (M. Adams); Yale  
7 University, New Haven, CT, USA (D. Katz); Wyoming Department of Health, Cheyenne, WY,  
8 USA; (J. Grandpre).

9 Corresponding author: Mary Adams, 247 N Stone St, West Suffield, CT 06093, (860-370-9035).

10 E-mail: madams.ontargethealthdata@gmail.com

11 Word count: Abstract: 144; text: 2,012;

12 Keywords: COVID-19; risk factors; complications

13 Running title: Adults at increased risk of COVID-19 complications

14 Article Summary Line: Overall, 45.4% of US adults were estimated to be at heightened risk of  
15 COVID-19 complications due to co-morbidities, increasing from 19.8% for ages 18-29 years to  
16 80.7% for ages 80+ years, with state-to-state variation.

17 Biographical Sketch: Mary Adams is currently consulting as On Target Health Data LLC in  
18 Suffield, CT but was an epidemiologist and BRFSS Coordinator for Connecticut from 1987 to  
19 2003. She has nearly 50 peer-reviewed publications on a wide range of topics, but with a focus  
20 on chronic diseases (including dementia) and their risk factors.

21

22 Abstract (144 words)

23 We used 2017 Behavioral Risk Factor Surveillance System (BRFSS) data (N=444,649) to

24 estimate the proportion of US adults who report comorbidities that suggest heightened risk of

25 complications from COVID-19. Co-morbidities included cardiovascular disease, chronic

26 obstructive pulmonary disease (COPD), diabetes, asthma, hypertension, and/or cancer other than

27 skin, based on data from China. Overall 45.4% (95% CI 45.1-45.7) of adults reported any of the

28 6 comorbidities, increasing from 19.8% (19.1-20.4) for ages 18-29 years to 80.7% (79.5-81.8)

29 for ages 80+ years. State rates ranged from 37.3% (36.2-38.5) in Utah to 58.7% (57.0-60.4) in

30 West Virginia. Rates also varied by race/ethnicity, health insurance status, and employment.

31 Excluded were residents of nursing homes or assisted living facilities. Although almost certainly

32 an underestimate of all adults at risk due to these exclusions, these results should help in

33 estimating healthcare needs for adults with COVID-19 complications living in the community.

34

35

36

## 37 Introduction

38           Since COVID-19 was discovered in China in late 2019, cases have spread far and wide and  
39 are putting a strain on healthcare systems in many countries. Data from China indicate that while  
40 81% of patients had mild cases, 14% of cases were severe and 5% were critical. (1,2). The  
41 overall case fatality rate (CFR) in China for 55,924 confirmed cases was 3.8% (3) with  
42 increased rates in adults with comorbid conditions including cardiovascular disease (CVD;  
43 CFR=13.2%, diabetes (9.2%), chronic respiratory disease (8.0%), hypertension (8.4%), and  
44 cancer (7.6%); the case fatality rate for those with none of these comorbid conditions was 1.4%  
45 (3). Our objective for this study was to use population based US data to estimate the  
46 approximate fraction of adults in the community who might be at heightened risk for  
47 complications from COVID-19 because they reported one of the 6 chronic conditions with high  
48 CFR in China.

49

## 50 Methods

51 We used publicly available 2017 Behavioral Risk Factor Surveillance System (BRFSS) data (4)  
52 from telephone surveys of 444,649 randomly selected adults ages 18 and older in the 50 states  
53 and the District of Columbia (DC). The BRFSS includes only non-institutionalized adults so  
54 residents of nursing homes and assisted living facilities are among those not surveyed. We chose  
55 to use 2017 data in order to include hypertension which was not addressed in 2018. Data were  
56 adjusted for the probability of selection and weighted to be representative of the adult population  
57 in each state by age, gender, race/ethnicity, marital status, education, home ownership, and  
58 telephone type and included weights and stratum variables needed for analysis. The median

59 response rate for cell phone and land line surveys combined was 47.2%, ranging from 33.9% in  
60 California to 61.1% in Utah (5). In addition to residents of nursing homes or assisted living  
61 facilities, persons unable to respond to a telephone survey are also excluded during the random  
62 selection process within a household. Reliability and validity of the BRFSS have been found to  
63 be moderate to high for many survey measures, in particular those used here which can be  
64 checked versus medical records (6).

65

## 66 Measures

67 The key variable was a composite measure including adults reporting they were ever told  
68 they had cardiovascular disease (CVD: a heart attack, angina, coronary heart disease, or a  
69 stroke), diabetes, current asthma (included as a chronic respiratory disease (2)), chronic  
70 obstructive pulmonary disease (COPD), hypertension, and/ or cancer other than skin. The  
71 number of comorbid conditions was counted for each respondent and the proportion of all adults  
72 who reported at least one of the comorbid conditions was considered to represent adults at  
73 heightened risk of complications from COVID-19. A secondary measure was receipt of a  
74 seasonal influenza vaccination in the past year as a rough estimate of potential demand for a  
75 COVID-19 vaccine when available.

76 Demographic measures included age group (18-29, 30-39, 40-49, 50-59, 60-69, 70-79, and  
77 80+ years, which was created by combining 5 year age groups provided in the data set), self-  
78 reported race/ethnicity (non-Hispanic white, Black or African American, Hispanic of any race,  
79 American Indian/Alaska native, Asian/Pacific Islander, and other), health insurance coverage  
80 (any kind of health care coverage, including health insurance, prepaid plans such as HMOs, or

81 government plans such as Medicare, or Indian Health Service), employment status (employed or  
82 self-employed, out of work, homemaker, student, retired, or unable to work), and state of  
83 residence which included the District of Columbia.

#### 84 Analysis

85 Stata version 14.1 (Stata Corp LP, College Station, TX) was used for data analysis to  
86 account for the complex sample design of the BRFSS. Point estimates and 95% confidence  
87 intervals are reported using the landline and cell phone weights, plus stratum and PSU variables  
88 supplied in the data set (4). Missing values were excluded from analysis. A total of 11,508  
89 records from the original survey sample of 444,649 were excluded due to missing data for any of  
90 the 6 chronic conditions, leaving a total N of 433,141. An additional 5,694 records were  
91 excluded due to missing values for age resulting in a final N for data including age groups of  
92 427,447.

93 We also used available case fatality rates from China (3) to estimate the fraction of adults  
94 in that country with any of the 6 comorbid conditions. We used the formula below and different  
95 estimates of the CFR for adults with at least one of the comorbid conditions, ranging from 7.6% -  
96 13.2%, including 9.28% which was the average, and 8.4% which is the rate for hypertension, the  
97 most prevalent comorbid condition (3); 1.4% was the CFR for those with none of the 6 and 3.8%  
98 was the overall CFR.

99 Formula:  $(CFR * X) + (1.4*(1-X)) = 3.8$  where CFR = rate of risk group and X= % in that risk  
100 group.

101

## 102 Results

103           Among all 444,649 survey respondents, 48.7% were male, 13.9% were ages 70+, 63.3%  
104 were white, 18.2% were retired, and 12.1% were uninsured, with similar results for the study  
105 sample with 11,508 records with missing values removed. Overall 45.4% (95% CI 45.1-45.7) of  
106 respondents reported one or more of the 6 comorbidities and were considered at heightened risk  
107 for complications from COVID-19. Among all adults, 26.7% (26.5-27.0) reported 1 co-  
108 morbidity, 12.0% (11.8-12.2) reported 2, 4.7% (4.6-4.8%) reported 3 and 2.0% (1.9-2.1) reported  
109 4 or more. Prevalence rates of the separate comorbidities were 8.5% for CVD, 6.6% for COPD,  
110 9.1% for asthma, 10.8% for diabetes, 32.4% for hypertension, and 6.8% for cancer. Rates of  
111 reporting one or more of the comorbid conditions increased from 19.8% (19.1-20.4) for ages 18-  
112 29 years to 80.7% (79.5-81.8) for ages 80+ years (Table 1.) While the percentage of adults with  
113 any of the comorbidities increased with age, over half (53.4%) of the total were ages 18-59 years  
114 because there are more adults in that age range compared with those 60 and older (71.3% vs.  
115 28.7% respectively). State rates ranged from 37.3% (36.2-38.5) in Utah to 58.7% (57.0-60.4) in  
116 West Virginia. Rates also varied by self-reported race/ethnicity, health insurance status, and  
117 employment, but not by gender (Table 1).

118           State results presented in Table 2 list the number of adults in each state at increased risk of  
119 complications and the percentage that number represents among all US adults who report at least  
120 one of the co-morbidities. These results were obtained directly from Stata which takes into  
121 account the complex sample design so will not agree with results obtained by simply dividing the  
122 state population estimate in the Table by 111.9 million. Results for reporting a seasonal flu  
123 vaccination in the past year were 40.3% (40.0-40.6) among all adults, including 33.7% (33.3-

124 34.2) for adults with none of the comorbidities and 48.0% (47.5-48.5) among those with any of  
125 the six.

126 Using the data from China (3) we estimated that between 20.3% and 38.7% of Chinese  
127 adults had any of the 6 comorbid conditions with the percentage most likely between 30.5% and  
128 34.2%.

## 129 Discussion

130 We found that 45.4% of US adults, with a wide range across age groups and states, may be  
131 at heightened risk of complications from COVID-19 due to existing comorbid conditions. And  
132 while the rates increase with age group to about 80% among those ages 70 and older, due to the  
133 fact that the majority (71%) of US adults is younger than age 60, 53% of those at heightened risk  
134 of complications are also younger than age 60 years. That is consistent with the finding that  
135 >60% of adults with multiple (2 or more) chronic conditions were younger than age 65 (7).  
136 Many of these younger adults with comorbid conditions may require hospitalization for these  
137 complications. Results in Tables 1 and 2 may be helpful to localities planning healthcare system  
138 needs for COVID-19. The median value of having any of the co-morbidities for all states is  
139 45.3, for planning purposes, states with rates in Table 1 that are above 45.3 might require  
140 proportionally more ICU beds and ventilators than those with rates below 45.3.

141 Currently there is a dearth of data on adults at risk for complications from COVID-19 that  
142 can be used for comparison. One source is a recent report from the Kaiser Foundation (8) that  
143 found 41% of US adults at risk of serious illness from COVID-19, defined as all adults ages 60  
144 and older and those 18-59 years with heart disease, cancer, COPD, or diabetes. Note that  
145 hypertension, which is the most common comorbid condition, was omitted in that study (8).

146 From our own estimates of the fraction of adults in China with any of the 6 comorbid conditions,  
147 we estimated that fraction as likely between 30.5% and 34% of all adults based on the average  
148 case fatality rate or that of the most prevalent condition, and within the range of 20.3-38.7%.  
149 From these few comparisons, it appears that the percentage of US adults with comorbid  
150 conditions increasing their risk of complications from COVID-19 is even higher than that in  
151 China. The implications for the US, if this is true, are disturbing but would be consistent with  
152 obesity rates in China being lower than in the US (9). In a recent US study that included all these  
153 comorbid conditions except cancer, obesity was a major contributor to diabetes, hypertension,  
154 and asthma and at least an indirect contributor to CVD (10). Other risk factors also contribute to  
155 these comorbid conditions (11) and will have different prevalence rates in different countries and  
156 population groups within countries.

157 The list of chronic conditions used in our analysis is very similar to groups at increased risk  
158 for seasonal influenza complications (12) except that latter group includes obese adults and  
159 children <2 years and excludes people with hypertension. Both lists include people with chronic  
160 diseases for which behavioral risk factors have been well identified (10,11). Behavioral risk  
161 factors appear to be very common among US adults with >95% of all adults reporting one or  
162 more (10) of the 7 CVD risk factors of smoking, sedentary lifestyle, obesity, diabetes,  
163 hypertension, high cholesterol, and inadequate fruit and vegetable consumption. Results from  
164 that study (10) found those 7 risk factors together contributed to an average of 41.4% of the  
165 burden of 5 of the 6 comorbidities (all except cancer) used in this current study, with obesity and  
166 smoking contributing the most.

167



168 Results showing seasonal flu vaccination rates below 50%, even for those with any of the 6  
169 chronic conditions that increase risk of complication from COVID-19, are concerning. Although  
170 a vaccine specific for this coronavirus is currently unavailable, results for seasonal flu  
171 vaccination suggest that it may not be widely used. It is encouraging that those with any of the 6  
172 co-morbidities appear more likely to be vaccinated for seasonal influenza than those with none.

### 173 Limitations

174 Our study does not address possible differences in contracting the disease, only the risk of  
175 developing complications among those with COVID-19, based on results from China (1-3). Only  
176 non-institutionalized adults are surveyed so 1.3 million adults in nursing homes (13) were  
177 excluded which almost certainly underestimates risk, as the first death in the US from COVID-  
178 19 was a nursing home resident (14). Data are self-reported and reliability and validity can vary  
179 for different measures tested (6). But as long as a respondent was told they had a chronic  
180 condition, validity was high. Low response rates could introduce bias but, as noted, validity  
181 appears high for the measures used in this study. Results are specific for this coronavirus in the  
182 US.

183 Conclusion: These results indicating 45.4% of adults are at potentially heightened risk of  
184 complications from COVID-19 due to chronic conditions should help state health officials in  
185 estimating health care needs. The US may never determine an accurate case fatality rate but it  
186 appears likely that it would be greater than the 3.8% reported for China. It should also be clear  
187 that while adults ages 70 and older are at higher risk it is because they are more likely to have the  
188 chronic conditions identified as increasing risk but that the majority of adults at risk are actually  
189 younger than age 70.

190           Funding: Data collection, analysis, and interpretation of data for this study were supported  
191 by the Centers for Disease Control and Prevention (CDC) Grant/Cooperative Agreement number  
192 1U58DP006069-01.

193

194

195

196

197   References

- 198       1. Wu Z, McGoogan JM. Characteristics of and important lessons from the coronavirus  
199       disease 2019 (COVID-19) outbreak in China: summary of a report of 72 314 cases from  
200       the Chinese Center for Disease Control and Prevention. JAMA. Published February 24,  
201       2020. doi:10.1001/jama.2020.2648
- 202       2. The Epidemiological Characteristics of an Outbreak of 2019 Novel Coronavirus Diseases  
203       (COVID-19) - China CCDC, February 17 2020.
- 204       3. Report of the WHO-China Joint Mission on Coronavirus Disease 2019 (COVID-19)  
205       [Pdf] - World Health Organization, Feb. 28, 2020
- 206       4. Behavioral Risk Factor Surveillance System (BRFSS) Survey Data and Documentation.  
207       [https://www.cdc.gov/brfss/data\\_documentation/index.htm](https://www.cdc.gov/brfss/data_documentation/index.htm). Accessed March 3, 2020.
- 208       5. Behavioral Risk Factor Surveillance System 2017 Summary Data Quality Report,  
209       Centers for Disease Control and Prevention, Atlanta, GA. June 13, 2018  
210       [https://www.cdc.gov/brfss/annual\\_data/2015/pdf/2015-](https://www.cdc.gov/brfss/annual_data/2015/pdf/2015-sdqr.pdf)  
211       sdqr.pdf[https://www.cdc.gov/brfss/annual\\_data/2017/pdf/2017-sdqr-508.pdf](https://www.cdc.gov/brfss/annual_data/2017/pdf/2017-sdqr-508.pdf) , accessed  
212       November 16, 2018.
- 213       6. Pierannunzi C, Hu SS, Balluz L. A systematic review of publications assessing reliability  
214       and validity of the Behavioral Risk Factor Surveillance System (BRFSS), 2004-2011.  
215       BMC Med Res Methodol. 2013 Mar 24;13:49. Doi: 10.1186/1471-2288-13-49.
- 216       7. Adams ML. Differences Between Younger and Older US Adults With Multiple Chronic  
217       Conditions. Prev Chronic Dis. 2017; 14: E76. Published online 2017 Sep 7. doi:  
218       10.5888/pcd14.160613

- 219 8. Koma W, Neuman T, Claxton G, Rae M, Kates J, Michaud J. How many adults are at  
220 risk of serious illness if infected with Coronavirus? Kaiser Family Foundation,  
221 Washington DC. March 2020 Data Note. [https://www.kff.org/global-health-policy/issue-](https://www.kff.org/global-health-policy/issue-brief/how-many-adults-are-at-risk-of-serious-illness-if-infected-with-coronavirus/)  
222 [brief/how-many-adults-are-at-risk-of-serious-illness-if-infected-with-coronavirus/](https://www.kff.org/global-health-policy/issue-brief/how-many-adults-are-at-risk-of-serious-illness-if-infected-with-coronavirus/)
- 223 9. Wu, Y. Overweight and obesity in China. *BMJ*. 2006 Aug 19; 333(7564): 362–363.  
224 doi: 10.1136/bmj.333.7564.362.
- 225 10. Adams M, Grandpre J, Katz D, Shenson D. The impact of key modifiable risk factors on  
226 leading chronic conditions. *Prev Med*. 2019 Mar;120:113-118.  
227 <https://doi.org/10.1016/j.ypmed.2019.01.006>.
- 228 11. Adams ML, Grandpre J, Katz DL, Shenson D. Linear association between number of  
229 modifiable risk factors and multiple chronic conditions: Results from the Behavioral Risk  
230 Factor Surveillance System. *Prev Med*. 2017 Dec;105:169-175. doi:  
231 10.1016/j.ypmed.2017.09.013. Epub 2017 Sep 14.
- 232 12. Influenza (flu): People at High Risk For Flu Complications. Centers for Disease Control  
233 and Prevention. (Atlanta, Georgia).  
234 [https://www.cdc.gov/flu/highrisk/index.htm?CDC\\_AA\\_refVal=https%3A%2F%2Fwww.](https://www.cdc.gov/flu/highrisk/index.htm?CDC_AA_refVal=https%3A%2F%2Fwww.cdc.gov%2Fflu%2Fabout%2Fdisease%2Fhigh_risk.htm)  
235 [cdc.gov%2Fflu%2Fabout%2Fdisease%2Fhigh\\_risk.htm](https://www.cdc.gov/flu/highrisk/index.htm?CDC_AA_refVal=https%3A%2F%2Fwww.cdc.gov%2Fflu%2Fabout%2Fdisease%2Fhigh_risk.htm).
- 236 13. Centers for Disease Control and Prevention (Atlanta, GA). National Center for Health  
237 Statistics; Nursing Home Care. <https://www.cdc.gov/nchs/fastats/nursing-home-care.htm>.
- 238 14. Centers for Disease Control and Prevention (Atlanta, GA). Washington State Report  
239 First COVID-19 Death. Media Statement Feb 29, 2020. Centers for Disease Control and  
240 Prevention. (Atlanta, Georgia). [https://www.cdc.gov/media/releases/2020/s0229-COVID-](https://www.cdc.gov/media/releases/2020/s0229-COVID-19-first-death.html)  
241 [19-first-death.html](https://www.cdc.gov/media/releases/2020/s0229-COVID-19-first-death.html).

Table 1. Demographics of adults with any of 6 chronic conditions

increasing risk for COVID-19 complications; 2017 Behavioral Risk Factor Surveillance System

| Population Group              | Percent | 95% CI    | Sample Size |
|-------------------------------|---------|-----------|-------------|
| Total                         | 45.4    | 45.1-45.7 | 433,141     |
| <b>Gender</b>                 |         |           |             |
| Males                         | 45.4    | 44.9-45.9 | 191,193     |
| Females                       | 45.4    | 45.0-45.9 | 241,695     |
| <b>Age (years)</b>            |         |           |             |
| 18-29                         | 19.8    | 19.1-20.4 | 46,660      |
| 30-39                         | 26.8    | 26.0-27.5 | 49,475      |
| 40-49                         | 38.1    | 37.3-39.0 | 53,609      |
| 50-59                         | 55.1    | 54.3-55.9 | 79,550      |
| 60-69                         | 68.0    | 67.3-68.6 | 96,663      |
| 70-79                         | 79.5    | 78.7-80.2 | 67,733      |
| 80+                           | 80.7    | 79.5-81.8 | 33,757      |
| <b>Race/ethnicity</b>         |         |           |             |
| White (non-Hispanic)          | 48.0    | 47.7-48.4 | 329,193     |
| Black                         | 52.1    | 51.1-53.1 | 35,087      |
| Hispanic                      | 35.5    | 34.5-36.5 | 31,624      |
| American Indian/Alaska Native | 55.5    | 52.9-58.1 | 8,082       |
| Asian/Pacific Islander        | 27.8    | 25.9-29.7 | 10,117      |
| Other                         | 46.5    | 44.5-48.4 | 10,854      |
| <b>Employment</b>             |         |           |             |
| Employed/self-employed        | 35.4    | 35.0-35.8 | 217,975     |
| Out of work                   | 47.0    | 45.5-48.5 | 18,644      |
| Homemaker                     | 39.6    | 38.2-41.0 | 22,790      |
| Student                       | 18.1    | 16.9-19.4 | 11,634      |
| Retired                       | 75.7    | 75.1-76.3 | 128,162     |
| Unable to work                | 79.3    | 78.3-80.3 | 30,510      |
| <b>Insurance status</b>       |         |           |             |

|           |      |           |         |
|-----------|------|-----------|---------|
| Insured   | 47.1 | 46.8-47.5 | 397,495 |
| Uninsured | 33.4 | 32.4-34.4 | 34,052  |

**State**

|    |      |           |        |
|----|------|-----------|--------|
| AL | 54.2 | 52.6-55.9 | 6,565  |
| AK | 43.6 | 40.7-46.5 | 3,124  |
| AZ | 44.6 | 43.6-45.6 | 15,086 |
| AR | 53.3 | 50.7-55.8 | 5,126  |
| CA | 41.0 | 39.6-42.4 | 9,149  |
| CO | 40.0 | 38.8-41.2 | 9,486  |
| CT | 45.0 | 43.7-46.3 | 10,298 |
| DE | 48.7 | 46.5-50.9 | 4,015  |
| DC | 38.3 | 36.4-40.1 | 4,400  |
| FL | 46.9 | 45.4-48.5 | 21,442 |
| GA | 45.6 | 44.0-47.2 | 5,895  |
| HI | 44.0 | 42.5-45.5 | 7,645  |
| ID | 42.6 | 40.7-44.5 | 4,791  |
| IL | 44.9 | 43.3-46.6 | 5,498  |
| IN | 48.7 | 47.5-49.8 | 13,489 |
| IA | 44.9 | 43.6-46.2 | 7,553  |
| KS | 45.9 | 45.1-46.8 | 21,233 |
| KY | 53.2 | 51.5-55.0 | 8,391  |
| LA | 51.6 | 49.7-53.5 | 4,680  |
| ME | 49.9 | 48.3-51.5 | 9,513  |
| MD | 44.9 | 43.5-46.2 | 13,179 |
| MA | 43.4 | 41.5-45.4 | 6,670  |
| MI | 49.4 | 48.2-50.6 | 10,584 |
| MN | 38.8 | 37.9-39.7 | 16,714 |
| MS | 51.9 | 49.8-54.0 | 4,937  |
| MO | 46.2 | 44.6-47.8 | 7,394  |
| MT | 44.0 | 42.3-45.8 | 5,793  |
| NE | 43.4 | 42.2-44.6 | 15,039 |
| NV | 46.1 | 43.7-48.5 | 3,683  |
| NH | 45.9 | 44.0-47.8 | 5,605  |
| NJ | 45.6 | 44.0-47.1 | 11,399 |

|    |      |           |        |
|----|------|-----------|--------|
| NM | 45.3 | 43.5-47.0 | 6,376  |
| NY | 42.2 | 41.0-43.4 | 11,951 |
| NC | 47.5 | 45.6-49.3 | 4,800  |
| ND | 42.0 | 40.5-43.6 | 6,862  |
| OH | 48.3 | 46.9-49.6 | 11,975 |
| OK | 50.7 | 49.0-52.3 | 6,369  |
| OR | 44.7 | 43.1-46.3 | 5,186  |
| PA | 47.8 | 46.2-49.5 | 6,405  |
| RI | 47.8 | 45.9-49.8 | 5,444  |
| SC | 49.9 | 48.6-51.3 | 10,953 |
| SD | 43.3 | 41.2-45.5 | 6,844  |
| TN | 51.1 | 49.3-53.0 | 5,679  |
| TX | 43.7 | 41.8-45.5 | 11,941 |
| UT | 37.3 | 36.2-38.5 | 9,994  |
| VT | 45.8 | 44.1-47.5 | 6,346  |
| VA | 45.2 | 43.8-46.6 | 9,394  |
| WA | 44.0 | 42.9-45.1 | 12,822 |
| WV | 58.7 | 57.0-60.4 | 5,332  |
| WI | 43.9 | 42.1-45.7 | 5,716  |
| WY | 44.0 | 42.2-45.9 | 4,376  |

\* Cardiovascular disease, diabetes, chronic obstructive pulmonary disease, asthma, hypertension, and/or cancer other than skin.

242

243

244 Table 2. Number of adults with any of 6 chronic conditions\* increasing risk for COVID-19  
245 complications and the percentage of the total in each state; 2017 Behavioral Risk Factor  
246 Surveillance System.

| State     | # Adults at risk | % of total |
|-----------|------------------|------------|
| AL        | 1,997,864        | 1.78       |
| AK        | 237,208          | 0.21       |
| AZ        | 2,351,799        | 2.1        |
| AR        | 1,181,105        | 1.06       |
| <b>CA</b> | 12,240,142       | 10.93      |
| CO        | 1,701,776        | 1.52       |
| CT        | 1,239,597        | 1.11       |
| DE        | 357,530          | 0.32       |
| DC        | 213,357          | 0.19       |
| <b>FL</b> | 7,696,749        | 6.88       |
| GA        | 3,541,358        | 3.16       |
| HI        | 486,156          | 0.43       |
| ID        | 534,533          | 0.48       |
| IL        | 4,404,556        | 3.93       |
| IN        | 2,428,188        | 2.17       |
| IA        | 1,067,133        | 0.95       |
| KS        | 983,323          | 0.88       |
| KY        | 1,789,444        | 1.6        |
| LA        | 1,806,330        | 1.61       |



|           |           |      |
|-----------|-----------|------|
| ME        | 530,809   | 0.47 |
| MD        | 2,054,758 | 1.84 |
| MA        | 2,302,809 | 2.06 |
| MI        | 3,749,235 | 3.35 |
| MN        | 1,625,778 | 1.45 |
| MS        | 1,150,036 | 1.03 |
| MO        | 2,137,650 | 1.91 |
| MT        | 356,113   | 0.32 |
| NE        | 616,905   | 0.55 |
| NV        | 1,048,591 | 0.94 |
| NH        | 485,340   | 0.43 |
| NJ        | 3,106,880 | 2.78 |
| NM        | 701,585   | 0.63 |
| <b>NY</b> | 6,419,321 | 5.73 |
| NC        | 3,713,582 | 3.32 |
| ND        | 243,096   | 0.22 |
| OH        | 4,268,748 | 3.81 |
| OK        | 1,461,941 | 1.31 |
| OR        | 1,418,689 | 1.27 |
| PA        | 4,738,414 | 4.23 |
| RI        | 393,069   | 0.35 |
| SC        | 1,912,134 | 1.71 |
| SD        | 281,110   | 0.25 |
| TN        | 2,610,800 | 2.33 |

|           |             |      |
|-----------|-------------|------|
| <b>TX</b> | 8,977,387   | 8.02 |
| UT        | 796,721     | 0.71 |
| VT        | 226,397     | 0.2  |
| VA        | 2,921,171   | 2.61 |
| WA        | 2,464,452   | 2.2  |
| WV        | 827,193     | 0.74 |
| WI        | 1,949,872   | 1.74 |
| WY        | 194,544     | 0.17 |
| Total     | 111,943,278 | 100  |

247

248 \* Cardiovascular disease, diabetes, chronic obstructive pulmonary disease,

249 asthma, hypertension, and/or cancer other than skin.
